# Supplementary material for: An Evaluation of Longitudinal Measures of Anticholinergic Exposure for Application in Retrospective Administrative Data Analyses
Source: Springer Nature journal article supplement (doi:10.1007/s12325-019-01035-z), 2019-08-05
Supplement: MOESM2 [file 17039436]

**eFigure 2: Anticholinergic medications and associated score across selected scales**

| Generic Name                                       | ACB | ARS | ADS | ABC | AAS | ALS |
|----------------------------------------------------|-----|-----|-----|-----|-----|-----|
| acarbose                                           |     |     | 0   |     |     |     |
| acepromazine                                       |     |     |     | 3   |     |     |
| aceprometazine                                     |     |     |     | 3   |     |     |
| acetaminophen                                      |     |     | 0   |     | 0   | 0   |
| acetaminophen/dichloralphe<br>nazone/isometheptene |     |     | 0   |     |     |     |
| acetazolamide                                      |     |     | 0   |     |     |     |
| acetic acid, TOPICAL                               |     |     | 0   |     |     |     |
| acetylcysteine                                     |     |     |     |     |     | 0   |
| acetylsalicylic                                    |     |     |     |     | 0   |     |
| acitratin                                          |     |     |     |     |     | 0   |
| acyclovir                                          |     |     | 0   |     |     |     |
| adenosine                                          |     |     | 0   |     |     |     |
| albuterol                                          |     |     | 0   |     |     |     |
| alendronate                                        |     |     | 0   |     |     |     |
| alimemazine                                        | 1   |     |     | 2   | 0   |     |
| allopurinol                                        |     |     | 0   |     | 0   | 0   |
| alprazolam                                         | 1   |     | 1   | 3   |     | 1   |
| aluminium                                          |     |     |     |     |     | 0   |
| aluminum                                           |     |     | 0   |     |     |     |
| alverine                                           | 1   |     |     | 2   |     |     |
| amantadine                                         | 2   | 2   | 1   |     |     |     |
| amiloride                                          |     |     | 0   |     |     | 0   |
| amiodarone                                         |     |     | 0   |     |     | 0   |
| amitriptyline                                      | 3   | 3   | 3   | 3   | 4   | 3   |
| amlodipine                                         |     |     | 0   |     | 0   | 0   |
| ammonium, TOPICAL                                  |     |     | 0   |     |     |     |
| amoxapine                                          | 3   |     |     | 3   |     |     |
| amoxicillin                                        |     |     | 0   |     |     | 0   |
| ampicillin                                         |     |     | 1   |     |     |     |
| anagrelide                                         |     |     | 0   |     |     |     |
| anastrozole                                        |     |     | 0   |     |     | 0   |
| anileridine                                        |     |     | 0   |     |     |     |
| antioxidant                                        |     |     |     |     |     | 0   |
| apraclonidine,<br>OPHTHALMIC                       |     |     | 0   |     |     |     |
| aripiprazole                                       | 1   |     |     |     |     | 0   |
| ascorbic acid                                      |     |     | 0   |     |     |     |
| asenapine                                          | 1   |     |     |     |     |     |
| aspirin                                            |     |     | 0   |     |     | 0   |
| hypromellose                                       |     |     |     |     |     | 0   |
| ibuprofen                                          |     |     | 0   |     | 0   | 0   |
| icodextrin                                         |     |     | 0   |     |     |     |
| iloperidone                                        | 1   |     |     |     |     |     |
| imipenem                                           |     |     | 0   |     |     |     |
| imipramine                                         | 3   | 3   | 3   | 3   |     | 3   |
| indapamide                                         |     |     | 0   |     |     | 0   |
| indomethacin                                       |     |     | 0   |     |     | 0   |
| influenza virus<br>vaccine                         |     |     |     |     |     | 0   |
| inositol                                           |     |     |     |     |     | 0   |
| insulin                                            |     |     | 0   |     | 0   | 0   |
| intestinal flora                                   |     |     |     |     |     | 0   |
| ipratropium                                        |     |     | 0   |     | 4   |     |
| irbesartan                                         |     |     | 0   |     |     | 0   |
| iron                                               |     |     | 0   |     |     |     |
| isoniazid                                          |     |     | 0   |     |     |     |
| isosorbiddinitrat                                  |     |     |     |     | 0   |     |
| isosorbide                                         | 1   |     | 1   |     |     | 0   |
| isradipine                                         |     |     | 0   |     |     |     |
| ketoconazole,<br>TOPICAL                           |     |     | 0   |     |     |     |
| ketoprofen                                         |     |     | 0   |     | 0   | 0   |
| ketotifen,<br>OPHTHALMIC                           |     |     | 1   |     |     |     |
| labetalol                                          |     |     | 0   |     |     | 0   |
| lactase                                            |     |     | 0   |     |     |     |
| lactic acid bacteria                               |     |     |     |     |     | 0   |
| lactobacillus                                      |     |     |     |     |     | 0   |
| lactulose                                          |     |     | 0   |     |     | 0   |
| lamotrigine                                        |     |     | 0   |     |     |     |
| lanolin-mineral oil,<br>TOPICAL                    |     |     | 0   |     |     |     |
| lansoprazole                                       |     |     | 0   |     | 1   | 0   |
| latanoprost                                        |     |     |     |     |     | 0   |
| latanoprost,<br>OPHTHALMIC                         |     |     | 0   |     |     |     |
| lercanidipine                                      |     |     |     |     |     | 0   |
| leuprolide                                         |     |     | 0   |     |     |     |
| levobunolol,<br>OPHTHALMIC                         |     |     | 0   |     |     |     |
| levocabastine                                      |     |     |     |     |     | 0   |
| levocetirizine                                     | 1   |     |     |     |     |     |
| levodopa                                           |     |     | 0   |     | 0   | 0   |

| Generic Name               | ACB | ARS | ADS | ABC | AAS | ALS |
|----------------------------|-----|-----|-----|-----|-----|-----|
| atenolol                   | 1   |     | 0   |     | 0   | 0   |
| atorvastatin               |     |     | 0   |     | 0   | 0   |
| atropine                   | 3   | 3   | 3   |     |     | 3   |
| azathioprine               |     |     | 1   |     |     |     |
| azithromycin               |     |     | 0   |     |     |     |
| bacitracin, OPHTHALMIC     |     |     | 0   |     |     |     |
| bacitracin, TOPICAL        |     |     | 0   |     |     |     |
| baclofen                   |     | 2   | 0   |     |     |     |
| balsam peru, TOPICAL       |     |     | 0   |     |     |     |
| beclomethasone             |     |     |     |     | 0   |     |
| beclomethasone, NASAL      |     |     | 0   |     |     |     |
| beclomethasone, NOT(NASAL) |     |     | 0   |     |     |     |
| belladonna                 | 2   |     |     | 3   |     |     |
| benazepril                 |     |     | 0   |     |     |     |
| benefiber                  |     |     |     |     | 0   |     |
| benzocaine, TOPICAL        |     |     | 0   |     |     |     |
| benzonatate                |     |     | 0   |     |     |     |
| benztropine                | 3   | 3   | 3   |     | 4   |     |
| beta carotene              |     |     | 0   |     |     |     |
| betahistine                |     |     |     |     | 0   |     |
| betaine                    |     |     |     |     | 0   |     |
| betamethasone              |     |     |     |     | 0   |     |
| betamethasone, TOPICAL     |     |     | 0   |     |     |     |
| betaxolol                  |     |     |     |     | 0   |     |
| betaxolol, OPHTHALMIC      |     |     | 0   |     |     |     |
| bethanechol                |     |     | 0   |     |     |     |
| bicalutamide               |     |     | 0   |     |     |     |
| bimatoprost                |     |     |     |     | 0   |     |
| bisacodyl                  |     |     | 0   |     | 1   |     |
| bismuth subsalicylate      |     |     | 0   |     |     |     |
| bisoprolol                 |     |     | 0   |     | 0   |     |
| brahmi                     |     |     |     |     | 0   |     |
| brimonidin                 |     |     |     |     | 0   |     |
| brimonidin, OPHTHALMIC     |     |     | 0   |     |     |     |
| brinzolamide               |     |     |     |     | 0   |     |
| brinzolamide, OPHTHALMIC   |     |     | 0   |     |     |     |
| bromhexine                 |     |     |     |     | 0   |     |
| bromocriptine              |     |     | 1   |     | 0   |     |
| brompheniramine            | 3   |     | 3   |     |     |     |
| brompheniramine maleate    | 1   |     |     |     |     |     |
| budesonide                 |     |     |     |     | 0   |     |

| Generic Name            | ACB | ARS | ADS | ABC | AAS | ALS |
|-------------------------|-----|-----|-----|-----|-----|-----|
| levofloxacin            |     |     | 0   |     |     |     |
| levomepromazine         |     |     |     | 3   |     |     |
| levothyroxine           |     |     | 0   |     |     |     |
| lidocaine               |     |     | 0   |     |     |     |
| lindane, TOPICAL        |     |     | 0   |     |     |     |
| liothyronine            |     |     | 0   |     |     |     |
| lisinopril              |     |     | 0   |     | 0   | 0   |
| lithium                 |     |     | 0   |     |     |     |
| lithium carbonate       |     |     |     |     |     | 1   |
| loperamide              | 1   | 2   | 1   |     |     | 1   |
| loratadine              | 1   | 2   | 0   |     |     | 1   |
| lorazepam               |     |     | 1   |     |     |     |
| losartan                |     |     | 0   |     | 0   |     |
| loteprednol, OPHTHALMIC |     |     | 0   |     |     |     |
| lovastatin              |     |     | 0   |     |     |     |
| loxapine                | 2   |     | 2   |     |     |     |
| lumiracoxib             |     |     |     |     |     | 1   |
| lysine                  |     |     | 0   |     |     |     |
| magnesium               |     |     | 0   |     |     |     |
| mannitol                |     |     | 0   |     |     |     |
| maprotiline             |     |     |     | 3   |     |     |
| mebeverine              |     |     |     |     |     | 0   |
| meclizine               | 3   | 3   | 3   |     |     |     |
| medroxyprogesterone     |     |     | 0   |     |     | 0   |
| megestrol               |     |     | 0   |     |     |     |
| melatonin               |     |     |     |     |     | 0   |
| meloxicam               |     |     |     |     |     | 0   |
| melperone               |     |     |     |     | 0   |     |
| memantine               |     |     |     |     |     | 0   |
| meperidine              | 2   |     | 2   |     | 0   |     |
| mepethidine             | 2   |     |     |     |     |     |
| meprobamate             |     |     | 0   |     |     |     |
| mesalamine              |     |     | 0   |     |     |     |
| mesalazine              |     |     |     |     |     | 0   |
| metamucil               |     |     |     |     |     | 0   |
| metaxalone              |     |     | 0   |     |     |     |
| metformin               |     |     | 0   |     |     | 1   |
| methazolamide           |     |     | 0   |     |     |     |
| methenamine             |     |     | 0   |     |     |     |
| methocarbamol           |     | 1   |     |     |     |     |
| methotrexate            |     |     | 0   |     |     | 1   |
| methotrimeprazine       | 2   |     | 2   |     |     |     |

| Generic Name                | ACB | ARS | ADS | ABC | AAS | ALS |
|-----------------------------|-----|-----|-----|-----|-----|-----|
| budesonide, NASAL           |     |     | 0   |     |     |     |
| budesonide, NOT(NASAL)      |     |     | 0   |     |     |     |
| bumetanide                  |     |     | 0   | 0   |     |     |
| buprenorphine               |     |     |     | 0   | 0   |     |
| bupropion                   | 1   |     | 0   |     |     |     |
| buspiron                    |     |     | 0   |     |     |     |
| butabarbital                |     |     | 0   |     |     |     |
| butalbital                  |     |     | 0   |     |     |     |
| cabergoline                 |     |     |     | 0   |     |     |
| caffeine                    |     |     | 0   |     |     |     |
| calamin, TOPICAL            |     |     | 0   |     |     |     |
| calcipotriene, TOPICAL      |     |     | 0   |     |     |     |
| calcitonin                  |     |     | 0   |     |     |     |
| calcitriol                  |     |     | 0   |     |     |     |
| calcium                     |     |     | 0   |     |     |     |
| camellose                   |     |     |     |     | 0   |     |
| camphor-menthol, TOPICAL    |     |     | 0   |     |     |     |
| candesartan                 |     |     | 0   |     |     |     |
| captopril                   | 1   |     | 1   | 0   | 0   |     |
| carbachtol, OPHTHALMIC      |     |     | 0   |     |     |     |
| carbamazepine               | 2   |     | 2   | 0   | 0   |     |
| carbamide, AURICULAR (OTIC) |     |     | 0   |     |     |     |
| carbidopa                   |     | 1   | 0   |     |     | 1   |
| carbimazole                 |     |     |     |     | 0   |     |
| carbinoxamine               | 3   |     | 3   |     |     |     |
| carisoprodol                |     | 3   | 0   |     |     |     |
| caritine                    |     |     |     |     | 0   |     |
| carvedilol                  |     |     | 0   |     | 0   |     |
| casanthranol                |     |     | 0   |     |     |     |
| cascara sagrada             |     |     | 0   |     |     |     |
| castor oil                  |     |     | 0   |     |     |     |
| cefaclor                    |     |     | 0   |     |     |     |
| cefadroxil                  |     |     | 1   |     |     |     |
| cefamandole                 |     |     | 1   |     |     |     |
| cefazolin                   |     |     | 0   |     |     |     |
| cefixime                    |     |     | 0   |     |     |     |
| cefoxitin                   |     |     | 1   |     |     |     |
| ceftibuten                  |     |     | 0   |     |     |     |
| ceftriaxone                 |     |     | 0   |     |     |     |
| cefuroxime                  |     |     | 0   |     |     |     |

| Generic Name                     | ACB | ARS | ADS | ABC | AAS | ALS |
|----------------------------------|-----|-----|-----|-----|-----|-----|
| methylclothiazide                |     |     | 0   |     |     |     |
| methylcellulose                  |     |     | 0   |     |     |     |
| methyl dopa                      |     |     | 0   |     |     |     |
| methylene blue                   |     |     | 0   |     |     |     |
| methylphenidate                  |     |     | 0   |     |     |     |
| methylprednisolone               |     |     |     |     |     | 0   |
| methylprednisolone, NOT(TOPICAL) |     |     | 1   |     |     |     |
| methylprednisolone, TOPICAL      |     |     | 0   |     |     |     |
| methyltestosterone               |     |     | 0   |     |     |     |
| metoclopramide                   |     | 1   | 0   | 0   | 1   |     |
| metolazone                       |     |     | 0   |     |     |     |
| metoprolol                       | 1   |     | 0   | 0   | 0   |     |
| metronidazole                    |     |     | 0   |     |     | 0   |
| mexiletine                       |     |     | 0   |     |     |     |
| mianserin                        |     |     |     | 0   |     |     |
| miconazole, TOPICAL              |     |     | 0   |     |     |     |
| midazolam                        |     |     | 1   |     |     |     |
| midodrine                        |     |     | 0   |     |     |     |
| mineral oil                      |     |     | 0   |     |     | 0   |
| minocycline                      |     |     | 0   |     |     |     |
| mirtazapine                      |     | 1   | 0   |     |     |     |
| misoprostol                      |     |     | 0   |     |     |     |
| moclobemide                      |     |     |     | 0   |     |     |
| mocobleamide                     |     |     |     |     |     | 0   |
| modafinil                        |     |     |     |     |     | 0   |
| moexipril                        |     |     | 0   |     |     |     |
| molindone                        | 2   |     | 2   |     |     |     |
| mometasone                       |     |     |     |     |     | 0   |
| mometasone, NASAL                |     |     | 0   |     |     |     |
| montelukast                      |     |     | 0   |     |     |     |
| morphine                         | 1   |     | 1   |     |     |     |
| moxifloxacin                     |     |     | 0   |     |     |     |
| moxonidine                       |     |     |     |     |     | 0   |
| multiple actives                 |     |     |     |     |     | 0   |
| multivitamin                     |     |     | 0   |     |     | 0   |
| mupirocin, TOPICAL               |     |     | 0   |     |     |     |
| nabumetone                       |     |     | 0   |     |     |     |
| nadolol                          |     |     | 0   |     |     |     |
| naloxone                         |     |     | 0   |     |     |     |
| naproxen                         |     |     | 0   | 0   | 0   |     |

| Generic Name               | ACB | ARS | ADS | ABC | AAS | ALS |
|----------------------------|-----|-----|-----|-----|-----|-----|
| celecoxib                  |     |     | 0   |     |     | 1   |
| candesartan                |     |     |     |     |     | 0   |
| cephalexin                 |     |     | 0   |     |     | 0   |
| cerivastatin               |     |     | 0   |     |     |     |
| Cetirizine                 | 1   | 2   | 0   |     |     | 2   |
| cetylpyridinium, TOPICAL   |     |     | 0   |     |     |     |
| charcoal                   |     |     |     |     |     | 0   |
| chloral hydrate            |     |     | 0   |     |     |     |
| chlorambucil               |     |     | 0   | 0   |     |     |
| chloramphenicol            |     |     |     |     |     | 0   |
| chlordiazepoxide           |     |     | 1   |     |     |     |
| chlorhexidine, TOPICAL     |     |     | 0   |     |     |     |
| chlorothiazide             |     |     | 0   |     |     |     |
| chlorpheniramine           | 3   | 3   | 3   | 3   |     | 3   |
| chlorpromazine             | 3   | 3   | 3   |     |     |     |
| chlorpropamide             |     |     | 0   |     |     |     |
| chlorprothixene            |     |     |     | 0   |     |     |
| chlorthalidone             | 1   |     | 1   |     |     | 0   |
| chlorzoxazone              |     |     | 0   |     |     |     |
| cholestyramine             |     |     | 0   |     |     |     |
| choline                    |     |     |     |     |     | 0   |
| chondroitin                |     |     | 0   |     |     |     |
| choral                     |     |     |     |     |     | 0   |
| ciclopirox, TOPICAL        |     |     | 0   |     |     |     |
| cilastatin                 |     |     | 0   |     |     |     |
| cilostazol                 |     |     | 0   |     |     |     |
| cimetidine                 | 1   | 2   | 2   |     |     |     |
| ciprofloxacin              |     |     | 0   |     |     |     |
| cisapride                  |     |     | 0   |     |     |     |
| citalopram                 |     |     | 0   |     | 2   | 1   |
| clarithromycin             |     |     | 0   |     |     |     |
| clavulanate                |     |     | 0   |     |     |     |
| clemastine                 | 3   |     | 3   |     |     |     |
| clidinium                  | 1   |     |     |     |     |     |
| clindamycin, NOT (TOPICAL) |     |     | 1   |     |     |     |
| clindamycin, TOPICAL       |     |     | 0   |     |     |     |
| clobazam                   |     |     | 0   |     |     |     |
| clodronate                 |     |     | 0   |     |     |     |
| clomethiazole              |     |     |     |     | 0   |     |
| clomipramine               | 3   |     | 3   | 3   |     |     |
| clonazepam                 |     |     | 1   |     |     | 1   |
| clonidine                  |     |     | 0   |     |     | 0   |
| naratriptan                |     |     |     |     |     | 1   |
| nateglinide                |     |     | 0   |     |     |     |
| nefazodone                 |     |     | 0   |     |     |     |
| nefopam                    | 2   |     |     |     |     |     |
| neomycin, OPTHALMIC        |     |     | 0   |     |     |     |
| niacin                     |     |     | 0   |     |     |     |
| nifedipine                 | 1   |     | 1   | 0   | 0   |     |
| nisoldipine                |     |     | 0   |     |     |     |
| nitrazepam                 |     |     |     |     | 0   | 0   |
| nitrofurantoin             |     |     | 0   |     |     |     |
| nitroglycerin              |     |     | 0   |     | 0   | 0   |
| nizatidine                 |     |     | 1   |     |     | 0   |
| norepinephrine             |     |     | 0   |     |     |     |
| norethisterone             |     |     |     |     |     | 0   |
| norfloxacin                |     |     | 0   |     |     | 0   |
| nortriptyline              | 3   | 2   | 3   |     | 3   |     |
| nutrapathic                |     |     |     |     |     | 0   |
| nystatin                   |     |     | 0   |     |     |     |
| octreotide                 |     |     | 0   |     |     |     |
| ofloxacin                  |     |     | 0   |     |     |     |
| olanzapine                 | 3   | 2   | 1   |     | 3   |     |
| olmesartan                 |     |     |     |     |     | 0   |
| olopatadine, OPTHALMIC     |     |     | 0   |     |     |     |
| omega-3                    |     |     |     |     |     | 0   |
| omeprazole                 |     |     | 0   |     | 0   | 0   |
| opipramol                  |     |     |     | 3   |     |     |
| orphenadrine               | 3   |     | 3   | 3   | 4   |     |
| oxazepam                   |     |     | 1   |     | 0   | 1   |
| oxcarbazepine              | 2   |     | 2   |     |     |     |
| oxybutynin                 | 3   | 3   | 3   | 3   | 4   | 2   |
| oxycodone                  |     |     | 1   |     |     | 1   |
| oxymetazoline, NASAL       |     |     | 0   |     |     |     |
| paliperidone               | 1   |     |     |     |     |     |
| pamidronate                |     |     | 0   |     |     |     |
| pancrelipase               |     |     | 0   |     |     | 0   |
| pancuronium                |     |     | 1   |     |     |     |
| pantoprazole               |     |     | 0   |     |     | 0   |
| papaverine                 |     |     | 0   |     |     |     |
| paroxetine                 | 3   | 1   | 1   |     | 3   | 2   |
| penicillin                 |     |     | 0   |     |     |     |
| pentazocine                |     |     |     |     | 0   |     |
| pentoxifylline             |     |     | 0   |     |     |     |

| Generic Name                                         | ACB | ARS | ADS | ABC | AAS | ALS |
|------------------------------------------------------|-----|-----|-----|-----|-----|-----|
| clopidogrel                                          |     |     | 0   |     |     | 0   |
| clorazepate                                          | 1   |     | 1   | 3   |     |     |
| clotrimazole                                         |     |     | 0   |     |     |     |
| cloxacillin                                          |     |     | 0   |     |     |     |
| clozapine                                            | 3   | 2   | 3   |     | 4   |     |
| codeine                                              | 1   |     | 1   | 2   | 0   | 1   |
| colchicine                                           | 1   |     | 0   | 3   |     | 0   |
| colestipol                                           |     |     | 0   |     |     |     |
| collagenase, TOPICAL                                 |     |     | 0   |     |     |     |
| colostrums                                           |     |     |     |     | 0   |     |
| conjugated                                           |     |     |     |     | 0   |     |
| conjugated estrogens                                 |     |     | 0   |     |     |     |
| cortisone                                            |     |     | 1   |     |     |     |
| coumadin                                             | 1   |     |     |     |     |     |
| cranberry                                            |     |     | 0   |     |     |     |
| cromolyn                                             |     |     | 0   |     |     |     |
| cyanocobalamin                                       |     |     | 0   |     |     |     |
| cyclobenzaprine                                      | 2   | 2   | 2   |     |     |     |
| cyclophosphamide                                     |     |     | 0   |     |     |     |
| cycloserine                                          |     |     | 1   |     |     |     |
| cyclosporine                                         |     |     | 1   |     |     |     |
| cyproheptadine                                       | 2   | 3   | 2   |     | 3   |     |
| danazol                                              |     |     | 0   |     | 0   |     |
| dantrolene                                           |     |     | 0   |     |     |     |
| darifenacin                                          | 3   |     | 3   |     |     |     |
| deferasirox                                          |     |     |     |     | 0   |     |
| demeclocycline                                       |     |     | 0   |     |     |     |
| desipramine                                          | 3   | 2   | 3   |     |     |     |
| desloratadine                                        | 1   |     |     |     |     |     |
| desmopressin                                         |     |     | 0   |     |     |     |
| desonide, TOPICAL                                    |     |     | 0   |     |     |     |
| desoximetasone, TOPICAL                              |     |     | 0   |     |     |     |
| dexamethasone                                        |     |     |     |     | 0   |     |
| dexamethasone, NASAL                                 |     |     | 0   |     |     |     |
| dexamethasone, NOT(TOPICAL NASAL OPHTHALMIC TOPICAL) |     |     | 1   |     |     |     |
| dexamethasone, OPTHALMIC                             |     |     | 0   |     |     |     |
| dexamethasone, TOPICAL                               |     |     | 0   |     |     |     |
| dexchlorpheniramine                                  |     |     |     | 3   |     | 3   |

| Generic Name                  | ACB | ARS | ADS | ABC | AAS | ALS |
|-------------------------------|-----|-----|-----|-----|-----|-----|
| pergolide                     |     |     | 0   | 0   |     |     |
| perindopril                   |     |     | 0   |     |     | 0   |
| permethrin, TOPICAL           |     |     | 0   |     |     |     |
| perphenazine                  | 3   | 3   | 1   | 0   |     |     |
| petrolatum, TOPICAL           |     |     | 0   |     |     |     |
| phenazopyridine               |     |     | 0   |     |     |     |
| phenelzine                    |     |     | 1   |     |     |     |
| phenobarbital                 |     |     | 0   | 1   |     |     |
| phenyl salicylate             |     |     | 0   |     |     |     |
| phenylephrine                 |     |     | 0   |     |     |     |
| phenylpropanolamine           |     |     | 0   |     |     |     |
| phenytoin                     |     |     | 0   |     |     |     |
| phytonadione                  |     |     | 0   |     |     |     |
| pilocarpine                   |     |     |     |     |     | 0   |
| pilocarpine, OPTHALMIC        |     |     | 0   |     |     |     |
| pimozide                      | 2   |     | 2   |     |     |     |
| pindolol                      |     |     | 0   |     |     |     |
| pioglitazone                  |     |     | 0   |     | 0   |     |
| piperacillin                  |     |     | 1   |     |     |     |
| pirbuterol                    |     |     | 0   |     |     |     |
| piroxicam                     |     |     | 0   | 0   | 0   |     |
| pivampicillin                 |     |     | 0   |     |     |     |
| pizotyline                    |     |     |     |     |     | 0   |
| polycarbophil                 |     |     | 0   |     |     |     |
| polyethylene                  |     |     |     |     |     | 0   |
| polyethylene glycol           |     |     | 0   |     |     |     |
| polymyxin b, OPTHALMIC        |     |     | 0   |     |     |     |
| polyvinyl                     |     |     |     |     |     | 0   |
| potassium                     |     |     | 0   |     |     |     |
| pramipexole                   |     | 1   | 0   | 0   |     |     |
| pramoxine, TOPICAL            |     |     | 0   |     |     |     |
| pravastatin                   |     |     | 0   |     |     | 0   |
| prazosin                      |     |     | 0   |     |     | 0   |
| prednisolone                  |     |     |     | 0   | 0   |     |
| prednisolone, NOT(OPHTHALMIC) |     |     | 1   |     |     |     |
| prednisolone, OPTHALMIC       |     |     | 0   |     |     |     |
| prednisone                    | 1   |     | 1   |     |     |     |
| primidone                     |     |     | 0   |     |     |     |

| Generic Name           | ACB | ARS | ADS | ABC | AAS | ALS |
|------------------------|-----|-----|-----|-----|-----|-----|
| dextran                |     |     |     |     |     | 0   |
| dextromethorphan       |     |     | 0   |     |     |     |
| dextropropoxepene      |     |     |     |     |     | 0   |
| diazepam               | 1   |     | 1   |     | 1   | 1   |
| diclofenac             |     |     | 0   |     |     | 0   |
| dicyclomine            | 3   | 3   | 3   |     |     |     |
| dienestrol, TOPICAL    |     |     | 0   |     |     |     |
| diflunisal             |     |     | 0   |     |     |     |
| digitoxin              |     |     | 1   |     | 1   |     |
| digoxin                | 1   |     | 1   | 3   | 1   | 1   |
| dihydroepiandrosterone |     |     |     |     |     | 0   |
| dihydroxyaluminum      |     |     | 0   |     |     |     |
| diltiazem              |     |     | 1   |     |     | 0   |
| dimenhydrinate         | 3   |     | 3   |     |     |     |
| dimeticone             |     |     |     | 0   |     |     |
| diphenhydramine        | 3   | 3   | 3   |     |     |     |
| diphenoxylate          |     |     | 0   |     |     | 0   |
| dipivefrin, OPTHALMIC  |     |     | 0   |     |     |     |
| dipyridamole           | 1   |     | 1   |     | 0   |     |
| dirithromycin          |     |     | 0   |     |     |     |
| disopyramide           | 1   |     | 2   |     | 0   | 0   |
| disulfuram             |     |     |     |     |     | 0   |
| divalproex             |     |     | 1   |     |     |     |
| dobutamine             |     |     | 0   |     |     |     |
| docusate               |     |     | 0   |     |     | 0   |
| domperidone            |     |     |     |     |     | 1   |
| donepezil              |     |     | 0   | 0   | 0   |     |
| dopamine               |     |     | 0   |     |     |     |
| dorzolamide            |     |     |     |     |     | 0   |
| dorzolamide, OPTHALMIC |     |     | 0   |     |     |     |
| dothiepin              |     |     |     |     |     | 2   |
| doxazosin              |     |     | 0   |     |     |     |
| doxepin                | 3   |     | 3   |     | 4   | 3   |
| doxycycline            |     |     | 0   |     |     | 0   |
| doxylamine             | 3   |     |     |     |     | 0   |
| ducosate               |     |     |     |     |     | 0   |
| duloxetine             |     |     | 0   |     |     | 0   |
| dydrogesterone         |     |     |     |     |     | 0   |
| econazole, TOPICAL     |     |     | 0   |     |     |     |
| edrophonium            |     |     | 0   |     |     |     |
| emepromium             |     |     |     |     | 4   |     |
| empracet               | 2   |     |     |     |     |     |
| enalapril              |     |     | 0   | 0   | 0   |     |
| enoxaparin             |     |     | 0   |     |     | 0   |

| Generic Name          | ACB | ARS | ADS | ABC | AAS | ALS |
|-----------------------|-----|-----|-----|-----|-----|-----|
| probenecid            |     |     | 0   |     |     | 0   |
| procainamide          |     |     | 0   |     |     |     |
| prochlorperazine      |     | 2   | 1   |     | 0   | 2   |
| procyclidine          | 3   |     | 3   |     |     |     |
| progesterone          |     |     | 0   |     |     | 0   |
| promazine             | 3   |     |     |     | 3   |     |
| promethazine          | 3   | 3   | 3   |     |     | 0   |
| propafenone           |     |     | 0   |     |     |     |
| propantheline         | 3   |     | 3   |     |     |     |
| propiverine           | 3   |     |     |     |     |     |
| propoxyphene          |     |     | 0   |     | 1   |     |
| propranolol           |     |     | 0   |     |     | 0   |
| propylene             |     |     |     |     |     | 0   |
| propylthiouracil      |     |     | 0   |     |     |     |
| protamine             |     |     |     |     |     | 0   |
| protriptyline         |     |     | 3   |     |     | 3   |
| pseudoephedrine       |     | 2   | 0   |     |     | 2   |
| psyllium              |     |     | 0   |     |     |     |
| pyrazinamide          |     |     | 0   |     |     |     |
| pyridostigmine        |     |     | 0   |     |     |     |
| pyridoxine            |     |     |     |     |     | 0   |
| pyrilamine            | 3   |     | 3   |     |     |     |
| quetiapine            | 3   | 1   | 0   |     | 2   |     |
| quinapril             |     |     | 0   |     |     | 0   |
| quinidine             | 1   |     | 0   |     |     |     |
| quinine               |     |     | 0   |     |     | 0   |
| rabeprazole           |     |     | 0   |     |     | 0   |
| raloxifene            |     |     | 0   |     |     |     |
| ramipril              |     |     | 0   |     |     | 0   |
| ranitidine            | 1   | 1   | 2   |     | 2   | 1   |
| reboxetine            |     |     |     |     |     | 0   |
| repaglinide           |     |     | 0   |     |     |     |
| reserpine             |     |     | 0   |     |     |     |
| rifampin              |     |     | 0   |     |     |     |
| rimantadine           |     |     | 0   |     |     |     |
| rimexolone, OPTHALMIC |     |     | 0   |     |     |     |
| risedronate           |     |     | 0   |     |     | 0   |
| risperidone           | 1   | 1   | 0   |     |     | 1   |
| rivastigmine          |     |     |     |     |     | 0   |
| rofecoxib             |     |     | 0   |     |     |     |
| ropinirole            |     |     | 0   |     | 0   | 0   |
| rosiglitazone         |     |     | 0   |     |     | 0   |
| rosuvastatin          |     |     |     |     |     | 0   |
| roxithromycin         |     |     |     |     |     | 0   |

| Generic Name             | ACB | ARS | ADS | ABC | AAS | ALS |
|--------------------------|-----|-----|-----|-----|-----|-----|
| entacapone               | 1   | 0   |     |     |     |     |
| epinephrine              |     |     |     |     | 0   |     |
| epoetin alfa             |     | 0   |     |     |     |     |
| eprosartan               |     |     |     |     | 0   |     |
| ergocalciferol           |     | 0   |     |     |     |     |
| ergoloid                 |     | 0   |     |     |     |     |
| erythromycin             |     | 0   |     | 0   |     |     |
| escitalopram             |     | 0   |     |     | 1   |     |
| esomeprazole             |     | 0   |     |     | 0   |     |
| estazolam                |     | 1   |     |     |     |     |
| esterified estrogens     |     | 0   |     |     |     |     |
| estradiol                |     |     |     |     | 0   |     |
| estradiol, NOT(TOPICAL)  |     | 0   |     |     |     |     |
| estradiol, TOPICAL       |     | 0   |     |     |     |     |
| estriol                  |     |     |     | 0   | 0   |     |
| estrogen                 |     |     |     |     | 0   |     |
| estropipate              |     | 0   |     |     | 0   |     |
| ethambutol               |     | 0   |     |     |     |     |
| ethinyl estradiol        |     | 0   |     |     |     |     |
| etidronate               |     | 0   |     |     |     |     |
| etodolac                 |     | 0   |     |     |     |     |
| ezetimibe                |     |     |     |     | 0   |     |
| famciclovir              |     |     |     |     | 0   |     |
| famotidine               |     | 1   |     |     | 0   |     |
| felbamate                |     | 0   |     |     |     |     |
| felodipine               |     | 0   |     |     | 0   |     |
| fenofibrate              |     | 0   |     |     | 0   |     |
| fentanyl                 | 1   | 1   |     |     | 0   |     |
| ferrous                  |     | 0   |     |     |     |     |
| fesoterodine             | 3   |     |     |     |     |     |
| fexofenadine             |     | 0   |     |     | 2   |     |
| filgrastim               |     | 0   |     |     |     |     |
| finasteride              |     | 0   |     |     | 0   |     |
| fish oil                 |     |     |     |     | 0   |     |
| flavoxate                | 3   | 3   |     |     |     |     |
| flecainide               |     | 0   |     |     | 0   |     |
| flucloxacillin           |     |     |     |     | 0   |     |
| fluconazole              |     | 0   |     |     |     |     |
| fludrocortisone          |     | 0   |     |     |     |     |
| flumazenil               |     | 0   |     |     |     |     |
| flunisolide              |     | 0   |     |     |     |     |
| salbutamol               |     |     |     |     | 0   | 0   |
| salicylic, TOPICAL       |     |     | 0   |     |     |     |
| salmeterol               |     |     | 0   |     |     | 0   |
| salsalate                |     |     | 0   |     |     |     |
| scopolamine              | 3   |     | 3   |     |     |     |
| selegiline               |     | 1   | 0   |     | 0   |     |
| selenium, TOPICAL        |     |     | 0   |     |     |     |
| senna                    |     |     | 0   |     |     | 0   |
| sennoside                |     |     |     |     |     | 0   |
| senokot                  |     |     |     |     |     | 0   |
| sertraline               |     |     | 1   |     | 0   | 0   |
| sildenafil               |     |     |     |     |     | 0   |
| silver, TOPICAL          |     |     | 0   |     |     |     |
| simethicone              |     |     | 0   |     |     | 0   |
| simvastatin              |     |     | 0   |     | 0   | 0   |
| sodium                   |     |     |     |     |     | 0   |
| sodium, NOT(OPHTHALMIC ) |     |     | 0   |     |     |     |
| sodium, OPHTHALMIC       |     |     | 0   |     |     |     |
| solifenacin              | 3   |     |     |     |     | 0   |
| sotalol                  |     |     | 0   |     |     | 0   |
| spironolactone           |     |     | 0   |     | 0   | 0   |
| sterculia                |     |     |     |     |     | 0   |
| succinylcholine          |     |     | 0   |     |     |     |
| sucralfate               |     |     | 0   |     |     |     |
| sulfacetamide            |     |     |     |     |     | 0   |
| sulfamethizole           |     |     | 0   |     |     |     |
| sulfamethoxazole         |     |     | 0   |     |     |     |
| sulfasalazine            |     |     |     |     |     | 0   |
| sulindac                 |     |     | 0   |     | 0   |     |
| sumatriptan              |     |     |     |     |     | 1   |
| tacrine                  |     |     | 0   |     |     |     |
| tadalafil                |     |     |     |     |     | 0   |
| tamoxifen                |     |     | 0   |     | 0   | 0   |
| tamsulosin               |     |     | 0   |     |     | 0   |
| telmisartan              |     |     |     |     |     | 0   |
| temazepam                |     |     | 1   |     |     | 1   |
| terazosin                |     |     | 0   |     |     |     |
| terbinafine              |     |     |     |     |     | 0   |
| terbinafine, TOPICAL     |     |     | 0   |     |     |     |
| terbutaline              |     |     | 0   |     | 0   | 0   |
| terconazole, TOPICAL     |     |     | 0   |     |     |     |

| Generic Name                      | ACB | ARS | ADS | ABC | AAS | ALS |
|-----------------------------------|-----|-----|-----|-----|-----|-----|
| flunitrazepam                     |     |     |     |     | 1   |     |
| fluocinonide, TOPICAL             |     |     | 0   |     |     |     |
| fluoride, TOPICAL                 |     |     | 0   |     |     |     |
| fluorometholone                   |     |     |     |     |     | 0   |
| fluorometholone, OPTHALMIC        |     |     | 0   |     |     |     |
| fluorouracil                      |     |     |     |     |     | 0   |
| fluoxetine                        |     |     | 1   | 2   | 1   |     |
| fluphenazine                      |     | 3   | 1   |     |     | 3   |
| flurazepam                        |     |     | 1   |     |     |     |
| flutamide                         |     |     | 0   |     |     |     |
| fluticasone                       |     |     | 0   |     |     | 0   |
| fluticasone-salmeterol            |     |     | 1   |     |     |     |
| fluvastatin                       |     |     | 0   |     |     | 0   |
| fluvoxamine                       | 1   |     | 1   | 2   | 1   |     |
| folic acid                        |     |     | 0   |     |     |     |
| formetolol                        |     |     |     |     |     | 0   |
| fosinopril                        |     |     | 0   |     |     | 0   |
| framycetin                        |     |     |     |     |     | 0   |
| frangula                          |     |     |     |     |     | 0   |
| furosemide                        | 1   |     | 1   | 3   | 1   | 0   |
| gabapentin                        |     |     | 0   |     |     | 0   |
| galantamin                        |     |     |     |     | 0   |     |
| galantamine                       |     |     | 0   |     |     | 0   |
| gemfibrozil                       |     |     | 0   |     |     | 0   |
| gentamicin                        |     |     | 1   |     |     |     |
| gentamicin, OPTHALMIC             |     |     | 0   |     |     |     |
| gentamicin, TOPICAL               |     |     | 0   |     |     |     |
| ginkgo                            |     |     | 0   |     |     | 0   |
| ginkgo biloba                     |     |     |     |     |     | 0   |
| ginseng                           |     |     |     |     |     | 0   |
| gliclazide                        |     |     |     |     |     | 0   |
| glimepiride                       |     |     | 0   |     |     | 0   |
| glipizide                         |     |     | 0   | 0   | 0   |     |
| glucagon                          |     |     | 0   |     |     |     |
| glucosamine                       |     |     | 0   |     |     | 0   |
| glucose                           |     |     |     |     |     | 0   |
| glyburide                         |     |     | 0   | 0   | 0   |     |
| glyceryl                          |     |     |     |     |     | 0   |
| glycerin, TOPICAL                 |     |     | 0   |     |     |     |
| testosterone                      |     |     |     |     |     | 0   |
| tetracycline                      |     |     | 0   |     |     |     |
| theophylline                      | 1   |     | 1   | 2   | 2   | 2   |
| thiamine                          |     |     | 0   |     |     |     |
| thioridazine                      | 3   | 3   | 3   |     | 4   |     |
| thiothixene                       |     | 3   | 1   |     |     |     |
| thyroid desiccated                |     |     | 0   |     |     |     |
| thyroid supplement                |     |     |     |     |     | 0   |
| thyroxin                          |     |     |     |     | 0   | 0   |
| tiaprofenic                       |     |     |     |     |     | 0   |
| tibolone                          |     |     |     |     |     | 0   |
| ticlopidine                       |     |     | 0   |     |     |     |
| tilactase                         |     |     |     |     |     | 0   |
| timolol                           |     |     | 0   |     | 0   | 0   |
| tiotropium                        |     |     |     |     |     | 0   |
| tizanidine                        |     | 3   |     |     |     |     |
| tobramycin, OPTHALMIC             |     |     | 0   |     |     |     |
| tolbutamide                       |     |     | 0   |     |     |     |
| tolcapone                         |     |     | 0   |     | 0   |     |
| tolterodine                       | 3   | 2   | 3   |     |     | 3   |
| topiramate                        |     |     | 0   |     |     |     |
| torseamide                        |     |     | 0   |     |     |     |
| tramadol                          |     |     | 1   |     |     | 2   |
| trandolapril                      |     |     | 0   |     |     | 0   |
| travoprost                        |     |     |     |     |     | 0   |
| trazodone                         | 1   | 1   | 0   |     |     |     |
| triamcinolone                     |     |     |     |     |     | 0   |
| triamcinolone, NASAL              |     |     | 0   |     |     |     |
| triamcinolone, NOT(NASAL TOPICAL) |     |     |     |     | 1   |     |
| triamcinolone, TOPICAL            |     |     | 0   |     |     |     |
| triamterene                       | 1   |     | 1   |     |     | 0   |
| triazolam                         |     |     | 1   |     |     |     |
| trichlormethiazide                |     |     | 0   |     |     |     |
| triethanolamine, AURICULAR (OTIC) |     |     | 0   |     |     |     |
| trifluoperazine                   | 3   | 3   | 1   |     |     |     |
| trihexyphenidyl                   | 3   |     | 3   | 3   | 4   |     |
| trimethoprim                      |     |     | 0   |     |     | 0   |
| trimipramine                      | 3   |     | 3   | 3   | 4   |     |
| troglitazone                      |     |     | 0   |     |     |     |



| Generic Name                                             | ACB | ARS | ADS | ABC | AAS | ALS | Generic Name  | ACB | ARS | ADS | ABC | AAS | ALS |
|----------------------------------------------------------|-----|-----|-----|-----|-----|-----|---------------|-----|-----|-----|-----|-----|-----|
| goserelin                                                |     |     |     |     |     | 0   | tropatepine   |     |     |     | 3   |     |     |
| gramicidine                                              |     |     |     |     |     | 0   | trospium      | 3   |     |     |     |     |     |
| guaifenesin                                              |     |     | 0   |     |     |     | trypsin       |     |     | 0   |     |     |     |
| guanfacine                                               |     |     | 0   |     |     |     | tuberculin    |     |     | 0   |     |     |     |
| halcinonide, TOPICAL                                     |     |     | 0   |     |     |     | ubidecarenone |     |     |     |     |     | 0   |
| haloperidol                                              | 1   | 1   | 0   |     | 0   | 2   | urea          |     |     |     |     |     | 0   |
| heparin                                                  |     |     | 0   |     |     |     | ursodiol      |     |     | 0   |     |     |     |
| herb                                                     |     |     |     |     |     | 0   | valproic      |     |     | 1   |     |     |     |
| histidine                                                |     |     |     |     |     | 0   | valsartan     |     |     | 0   |     |     |     |
| hormone replacement therapy                              |     |     |     |     |     | 0   | vancomycin    |     |     | 1   |     |     |     |
| hydralazine                                              | 1   |     | 1   |     |     | 0   | vardenafil    |     |     |     |     |     | 0   |
| hydrochlorothiazide                                      |     |     | 0   |     | 0   | 0   | varenicline   |     |     |     |     |     | 0   |
| hydrocodone                                              |     |     | 0   |     |     |     | vecuronium    |     |     | 0   |     |     |     |
| hydrocortisone                                           | 1   |     |     |     |     | 0   | venlafaxine   | 1   |     | 0   |     | 0   | 1   |
| hydrocortisone, AURICULAR (OTIC)                         |     |     | 0   |     |     |     | verapamil     |     |     | 0   |     | 0   | 0   |
| hydrocortisone, NOT(OPHTHALMIC AURICULAR (OTIC) TOPICAL) |     |     | 1   |     |     |     | vitamin       |     |     |     |     |     | 0   |
| hydrocortisone, OPTHALMIC                                |     |     | 0   |     |     |     | vitamine      |     |     | 0   |     |     |     |
| hydrocortisone, TOPICAL                                  |     |     | 0   |     |     |     | warfarin      |     |     | 1   |     | 0   | 0   |
| hydromorphone                                            |     |     | 0   |     |     |     | zafirlukast   |     |     | 0   |     |     |     |
| hydroxychloroquine                                       |     |     | 0   |     |     | 0   | zaleplon      |     |     | 0   |     |     |     |
| hydroxyethylrutosides                                    |     |     |     |     |     | 0   | zinc          |     |     | 0   |     |     |     |
| hydroxypropyl                                            |     |     |     |     |     | 0   | ziprasidone   |     | 1   |     |     |     |     |
| hydroxypropyl, OPTHALMIC                                 |     |     | 0   |     |     |     | zolmitriptan  |     |     |     |     |     | 1   |
| hydroxyurea                                              |     |     | 0   |     |     |     | zolpidem      |     |     | 0   |     |     | 0   |
| hydroxyzine                                              | 3   | 3   | 3   | 3   |     |     | zopiclone     |     |     | 0   |     | 0   | 0   |
| hyoscyamine                                              | 3   | 3   | 3   |     |     |     |               |     |     |     |     |     |     |

**Key:** Anticholinergic Activity Scale (AAS); Anticholinergic Burden Classification (ABC); Anticholinergic Cognitive Burden (ACB); Anticholinergic Drug Scale (ADS); Anticholinergic Loading Scale (ALS); Anticholinergic Risk Scale (ARS)
